# Supplementary material
Source: PubMed Central journal article supplement (PMC1401514)
Supplement: nar_34_5_1532__1.pdf [file nar_34_5_1532__1.pdf]

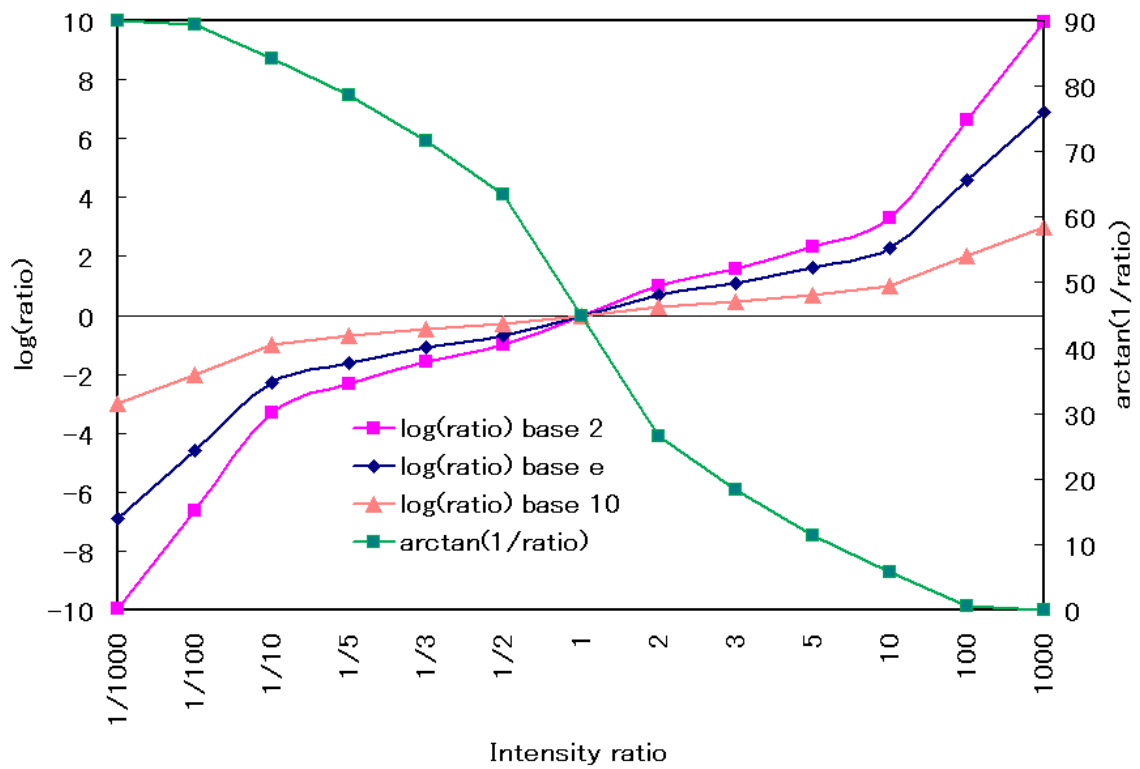

**Supplementary Figure 1** A new index [ $\arctan(1/\text{ratio})$ ] and current log transformed indices [ $\log(\text{ratio})$ ] for gene expression ratios.
