# Supplementary material
Source: PubMed Central journal article supplement (PMC1401514)
Supplement: nar_34_5_1532__5.pdf [file nar_34_5_1532__5.pdf]

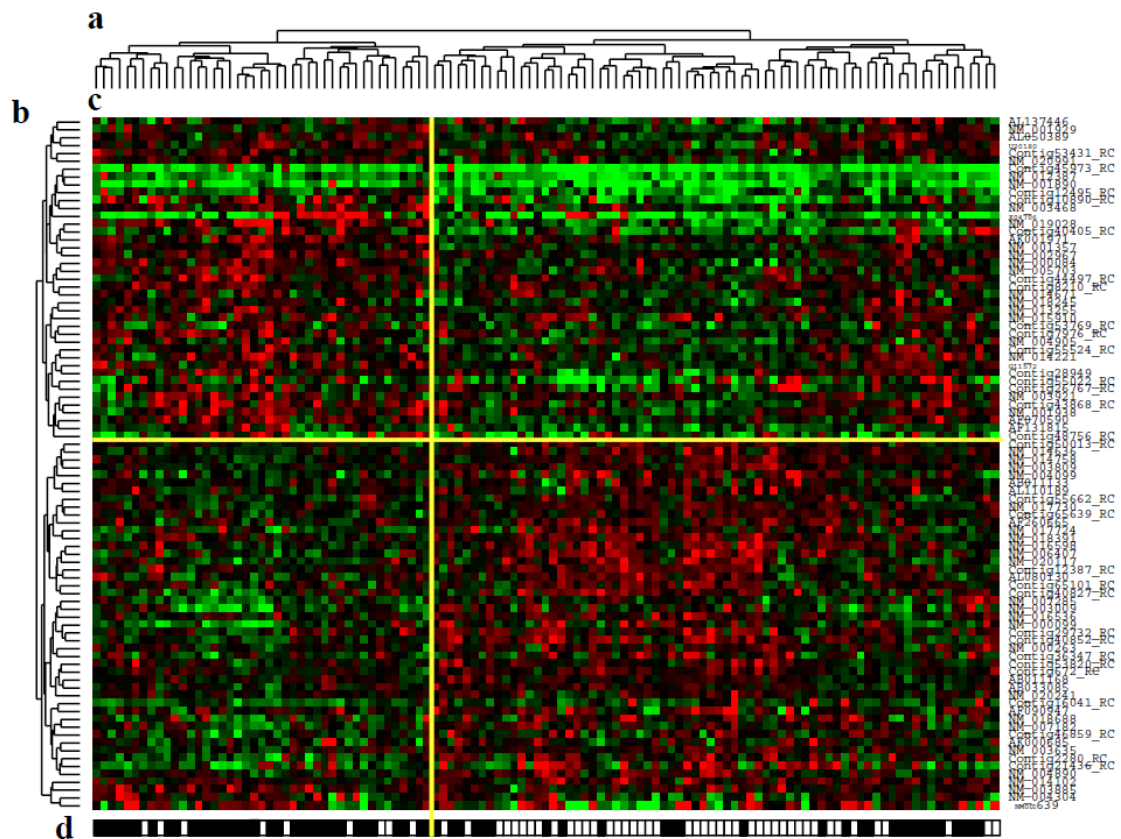

**Supplementary Figure 4.** A hierarchical clustering of 115 samples and 88 gene expression profiles. (a) Clustering for the samples. (b) Clustering for the genes. (c) Each column and row shows a sample and a gene, respectively. Red and green represent up- and down-regulations, respectively. The vertical and horizontal yellow lines mark the subdivision in sample and gene clusters, respectively. (d) Black and white indicate a cancer sample and a cancer-free sample, respectively.
