# Supplementary material
Source: PubMed Central journal article supplement (PMC1401514)

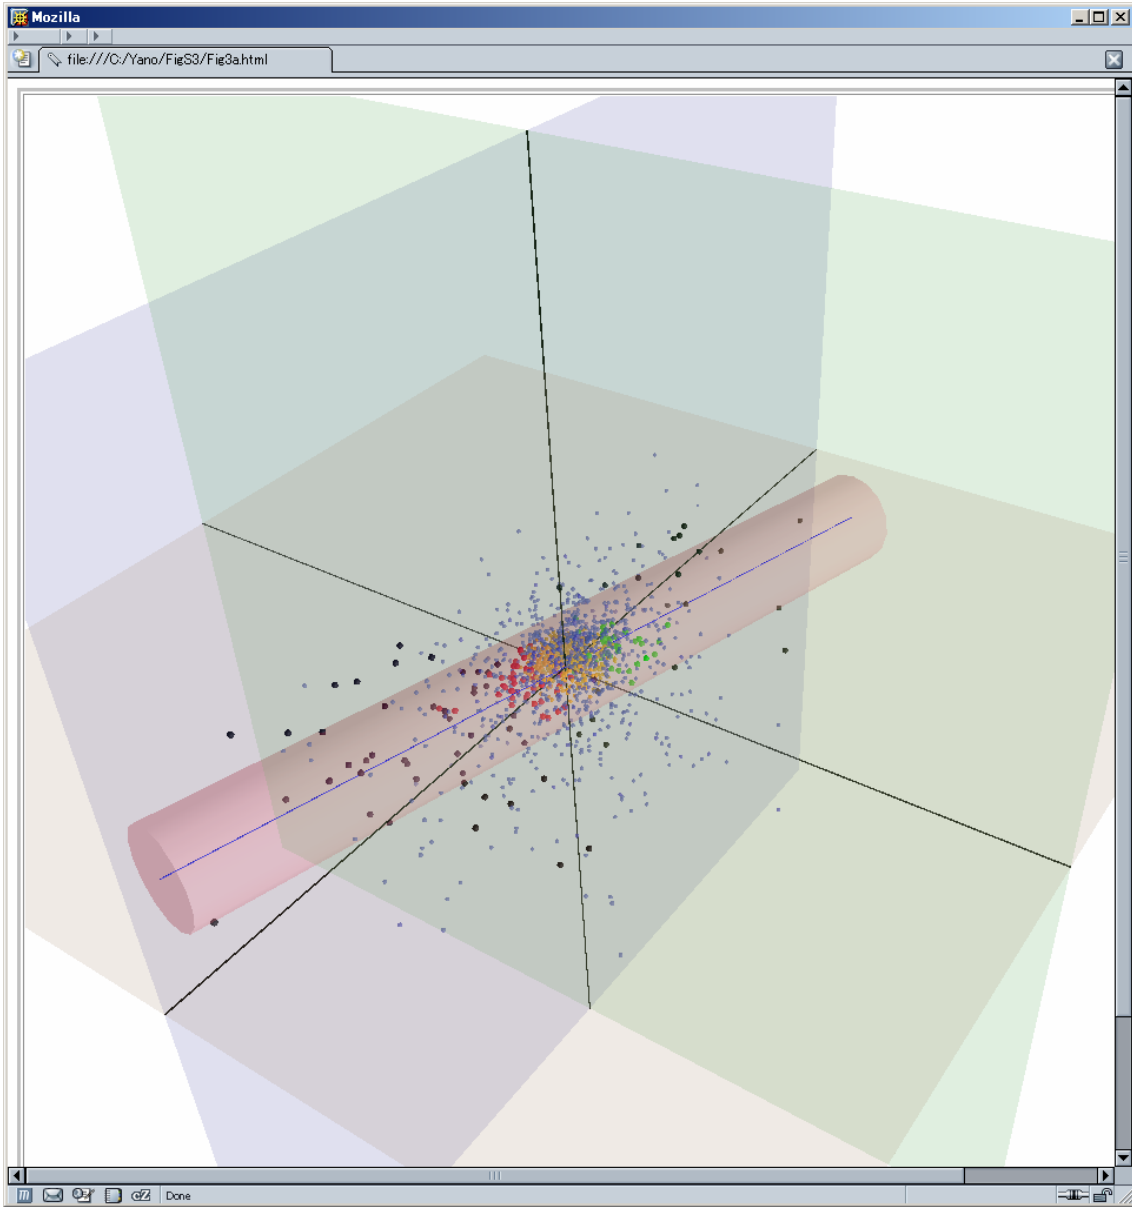

Supplement: nar_34_5_1532__3.pdf [file nar_34_5_1532__3.pdf]

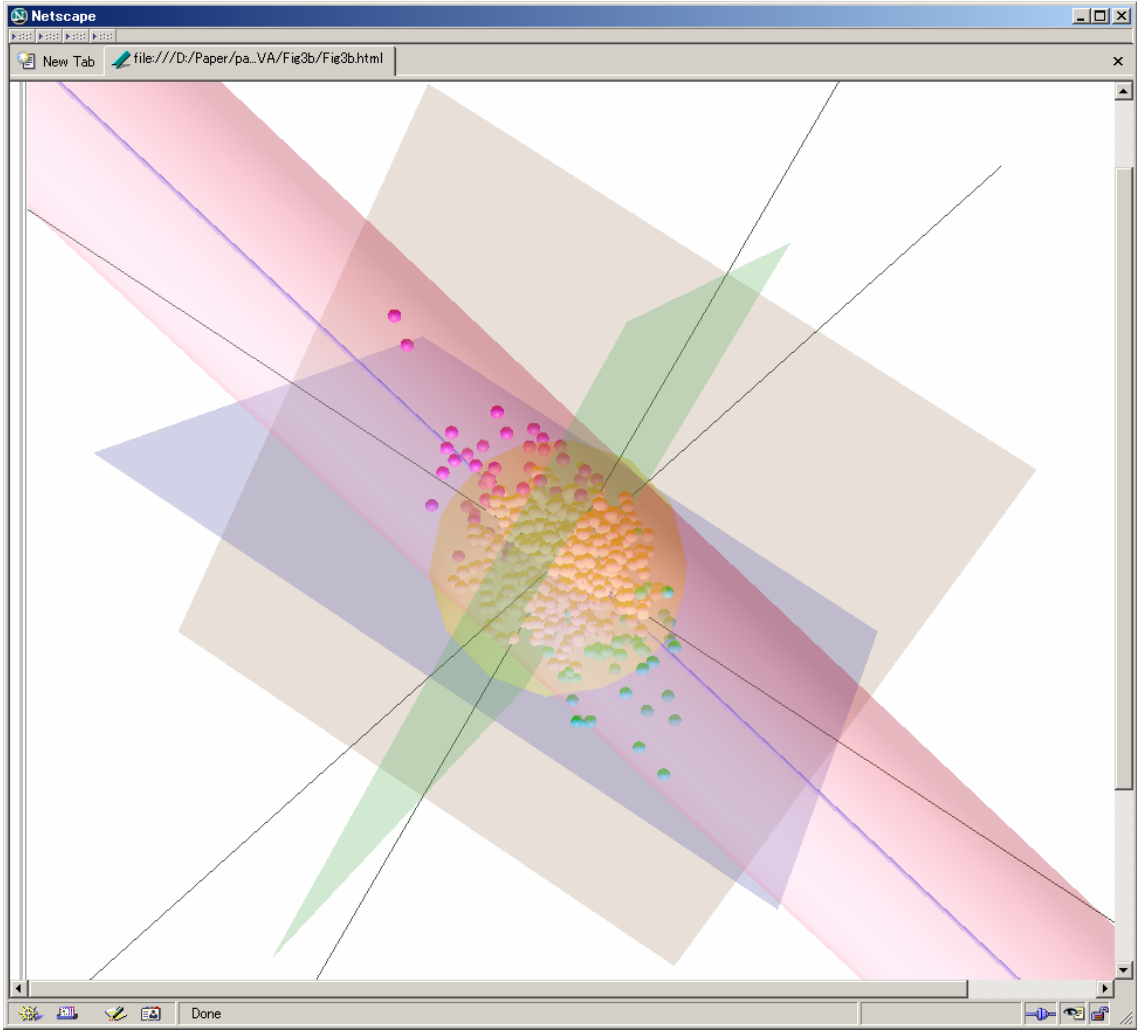

Supplement: nar_34_5_1532__4.pdf [file nar_34_5_1532__4.pdf]
